# Supplementary material
Source: Research Square preprint supplement (doi:10.21203/rs.3.rs-7414615/v1)
Supplement: Supplementary file 1 [file 086086a42934f88167b76c50.docx]

**參加者編號 (由研究員填寫)**

**第一部分：一般健康問卷(GHQ12)**

我們想知道這**一個月**以來，你有沒有不舒服，和你的健康情況。如果你覺得那個答案適合你就圈起來。記著，我們是想知道你最近和現在的情況，而不是從前的問題。請你盡量回答所有的問題。這點十分重要。謝謝合作！

你最近是不是：

|  |  | 否 | 是 |
| --- | --- | --- | --- |
|  | 做事能集中注意力(集中精神)﹖ | 0 | 1 |
|  | 為擔憂而失眠﹖ | 0 | 1 |
|  | 覺得一般事情自己處理得很好﹖ | 0 | 1 |
|  | 對自己做事的方式感到滿意﹖ | 0 | 1 |
|  | 覺得總是有精神上的壓力﹖ | 0 | 1 |
|  | 覺得無法克服困難﹖ | 0 | 1 |
|  | 覺得日常生活有趣味﹖ | 0 | 1 |
|  | 能夠勇敢地面對問題﹖ | 0 | 1 |
|  | 覺得心情不快樂及憂慮﹖ | 0 | 1 |
|  | 對於自己失去信心﹖ | 0 | 1 |
|  | 覺得自己無用﹖ | 0 | 1 |
|  | 大致上感到快樂﹖ | 0 | 1 |
|  |  |  |  |

**第二部分：性風險量表(SRS)**

請仔細閱讀下列句子，並在空白處記下**你在過去6個月內**對每一題的正確數字。

如果你不能確定一個行為發生了多少次，試著盡可能地估計這個數字，想想這種行為每週或每月發生的平均次數，這會讓我們更容易估算出一個準確的數字，尤其是如果這種行為經常發生的話。

如果你有多個性伴侶，試著想想你和每一個性伴侶在一起的時間有多長和你和每一個性接觸的次數，並試著對每一種行為的總數做出一個準確的估計。如果這個問題不適用於你，或者你從來沒有做過這個問題中的行為，在空白處標記“0”。請不要留空項目。

在下面的問題中，“性”包括口交、肛交和陰道性交；“性行為”包括激情親吻、親熱、愛撫、愛撫、口對肛門的刺激和手對生殖器的刺激。

|  | 次數 |
| --- | --- |
| 1. 你有多少性伴侶與你有過性行為卻沒有發生性關係? |  |
| 2. 有多少次你和你剛認識的人一起參加社交活動? |  |
| 3.有多少次你“勾搭上”了，卻沒有和你不認識或不太了解的人發生性關係? |  |
| 4. 有多少次你去酒吧/聚會/社交活動的目的是“勾搭”及進行性行為，但沒有和某人發生性關係? |  |
| 5. 有多少次你去酒吧/聚會/社交活動的目的是為了“勾搭”並發生性關係? |  |
| 6. 你有過多少次意想不到的性經歷? |  |
| 7. 有多少次你自願與人發生性關係，但事後又後悔? |  |
| **請按照前面的步驟回答以下的問題。在第8-23題中，如果你從未有過性行為(口交、肛交或陰道性交)，請在空格處填上“0”。** |  |
| 8. 你和多少個伴侶發生過性關係? |  |
| 9. 有多少次你是用乳膠或聚氨酯避孕套進行陰道性交的?注意:包括你使用羊皮或薄膜避孕套的次數。 |  |
| 10. 你有過幾多次陰道性交而沒有採取避孕措施? |  |
| 11. 你有多少次沒有用避孕套的口交或被口交(對男人口交)經歷? |  |
| 12. 有多少次你在沒有口腔保護膜或沒有“充分保護”的情況下進行或接受舔陰(對女性口交)? |  |
| 13. 你有多少次進行沒有使用避孕套的肛交? |  |
| 14. 你或你的伴侶有多少次在沒有使用乳膠手套或避孕套的情況下通過手或其他物體進行肛交，然後進行無保護的肛交? |  |
| 15. 有多少次你給予或接受了肛門的口腔刺激，並沒有使用口腔保護膜或沒有提供足夠的保護? |  |
| 16. 有多少人與你發生過性關係但是他們和你沒有任何關係(例如 “炮友”)? |  |
| 17. 你有多少次和一個你不熟悉或剛認識的人發生過性關係? |  |
| 18. 你或你的伴侶有多少次在做愛前或做愛時飲酒或吸毒? |  |
| 19. 在討論性史、靜脈注射藥物、疾病狀況和其他現有性伴侶之前，你與新伴侶發生過多少次性行為? |  |
| 20.你有多少次和一個你知道有很多性伴侶的人發生過性關係? |  |
| 21. 有多少(以你所知)你曾經和性行為活躍但沒有接受性傳播感染/艾滋病檢測的伴侶發生過性行為? |  |
| 22. 你有多少個你不信任的性伴侶? |  |
| 23. 有多少次(以你所知)你和一個在同一時期還與他人發生性關係的人發生過性關係? |  |

**第三部分：日常歧視量表 (SSS-S)**

請仔細閱讀下列句子，在你的日常生活中，以下這些事情發生的頻率有多高? 如果你覺得那個答案適合你就圈起來。

|  | 從不 | 不到一年一次 | 一年幾次 | 一個月幾次 | 至少一周一次 | 至少一周一次 |
| --- | --- | --- | --- | --- | --- | --- |
| 1. 你受到的禮貌對待比別人少。 | 0 | 1 | 2 | 3 | 4 | 5 |
| 1. 你受到的尊重比別人少。 | 0 | 1 | 2 | 3 | 4 | 5 |
| 1. 在餐館或商店，你得到的服務比別人差。 | 0 | 1 | 2 | 3 | 4 | 5 |
| 4. 人們表現得好像他們認為你不聰明。 | 0 | 1 | 2 | 3 | 4 | 5 |
| 5. 人們表現得好像他們害怕你。 | 0 | 1 | 2 | 3 | 4 | 5 |
| 6.人們表現得好像他們認為你不誠實。 | 0 | 1 | 2 | 3 | 4 | 5 |
| 7. 人們表現得好像他們比你強。 | 0 | 1 | 2 | 3 | 4 | 5 |
| 8. 你被辱罵或侮辱。 | 0 | 1 | 2 | 3 | 4 | 5 |
| 9. 你受到威脅或騷擾。 | 0 | 1 | 2 | 3 | 4 | 5 |

**第四部分：生活恢復力量表 (CDRS)**

請仔細閱讀以下每一個句子，如果你覺得那個答案適合你就圈起來。

答案並無對錯之分，請不要花太多時間在某一句子上。

|  | 從不 | 很少 | 有時 | 經常 | 一直如此 |
| --- | --- | --- | --- | --- | --- |
| 1. 我能夠適應變化。 | 0 | 1 | 2 | 3 | 4 |
| 2. 我能應付發生的任何事。 | 0 | 1 | 2 | 3 | 4 |
| 3. 當我面對問題的時候，我試著去看事情幽默的一面。 | 0 | 1 | 2 | 3 | 4 |
| 4. 應對壓力可以讓我更強大。 | 0 | 1 | 2 | 3 | 4 |
| 5. 我傾向於在生病、受傷或其他困難後恢復過來。  6. 我相信即使有障礙，我能實現我的目標。 | 0 | 1 | 2 | 3 | 4 |
| 7. 在壓力下，我能保持注意力集中，思維清晰。 | 0 | 1 | 2 | 3 | 4 |
| 8. 我不會輕易因失敗而氣餒。 | 0 | 1 | 2 | 3 | 4 |
| 9. 我認為當處理生活的挑戰和困難，自己是一個堅強的人。 | 0 | 1 | 2 | 3 | 4 |
| 10. 我能夠處理不愉快或痛苦的感覺，如悲傷、恐懼和憤怒。 | 0 | 1 | 2 | 3 | 4 |

**第五部分︰生活感知與掌握度量表 (12 items-SCS )**

請仔細閱讀以下每一個句子，量表分開個人掌握和感知到的約束兩個部分，如果你覺得那個答案適合你就圈起來。

|  | 非常同意 | 同意 | 稍為同意 | 普通 | 稍為不同意 | 不同意 | 非常不同意 |
| --- | --- | --- | --- | --- | --- | --- | --- |
| **個人掌握方面** | 1 | 2 | 3 | 4 | 5 | 6 | 7 |
| 1. 我能做任何我真正下定決心做的事。 | 1 | 2 | 3 | 4 | 5 | 6 | 7 |
| 2. 當我真的想做某事時，我通常會找到成功的方法。 | 1 | 2 | 3 | 4 | 5 | 6 | 7 |
| 3. 我自己掌握我是否能得到我想要的。 | 1 | 2 | 3 | 4 | 5 | 6 | 7 |
| 4. 將來會發生什麼主要取決於我自己。 | 1 | 2 | 3 | 4 | 5 | 6 | 7 |
| **感知到的約束** | 1 | 2 | 3 | 4 | 5 | 6 | 7 |
| 5. 我幾乎不能做什麼來改變我生命中重要的事情。 | 1 | 2 | 3 | 4 | 5 | 6 | 7 |
| 6. 在處理生活中的問題時，我經常感到無助。 | 1 | 2 | 3 | 4 | 5 | 6 | 7 |
| 7. 我能做什麼和不能做什麼，大部分是由別人決定的。 | 1 | 2 | 3 | 4 | 5 | 6 | 7 |
| 8. 生活中發生的事情往往是我無法控制的。 | 1 | 2 | 3 | 4 | 5 | 6 | 7 |
| 9. 有許多事情妨礙我想做的事情。 | 1 | 2 | 3 | 4 | 5 | 6 | 7 |
| 10. 我無法控制發生在我身上的事情。 | 1 | 2 | 3 | 4 | 5 | 6 | 7 |
| 11. 我真的沒有辦法解決我的問題。 | 1 | 2 | 3 | 4 | 5 | 6 | 7 |
| 12. 我有時覺得自己在生活中受人擺佈。 | 1 | 2 | 3 | 4 | 5 | 6 | 7 |

**第六部分︰個人社會資本量表(PSC)**

請仔細閱讀以下每一個句子，量表分開十個社會資別本部分，如果你覺得那個答案適合你就圈起來。

| **資本一：你如何評價下列六類中的每一類人的人數?** | | | | | |
| --- | --- | --- | --- | --- | --- |
|  | 很多 | 多於一般 | 一般 | 少於一般 | 很少 |
| 1. 家庭成員 | 5 | 4 | 3 | 2 | 1 |
| 1. 親戚 | 5 | 4 | 3 | 2 | 1 |
| 1. 鄰居 | 5 | 4 | 3 | 2 | 1 |
| 1. 朋友 | 5 | 4 | 3 | 2 | 1 |
| 1. 同事 | 5 | 4 | 3 | 2 | 1 |
| 1. 同鄉/舊同學 | 5 | 4 | 3 | 2 | 1 |
| **資本二：你與下列各類別的多少人保持日常聯繫?** | | | | | |
|  | 全部 | 大部分 | 一些 | 很少 | 沒有 |
| 1. 家庭成員 | 5 | 4 | 3 | 2 | 1 |
| 1. 親戚 | 5 | 4 | 3 | 2 | 1 |
| 1. 鄰居 | 5 | 4 | 3 | 2 | 1 |
| 1. 朋友 | 5 | 4 | 3 | 2 | 1 |
| 1. 同事 | 5 | 4 | 3 | 2 | 1 |
| 1. 同鄉/舊同學 | 5 | 4 | 3 | 2 | 1 |
| **資本三：在以下六類人當中，你能信任多少人?** | | | | | |
|  | 全部 | 大部分 | 一些 | 很少 | 沒有 |
| 1. 家庭成員 | 5 | 4 | 3 | 2 | 1 |
| 1. 親戚 | 5 | 4 | 3 | 2 | 1 |
| 1. 鄰居 | 5 | 4 | 3 | 2 | 1 |
| 1. 朋友 | 5 | 4 | 3 | 2 | 1 |
| 1. 同事 | 5 | 4 | 3 | 2 | 1 |
| 1. 同鄉/舊同學 | 5 | 4 | 3 | 2 | 1 |
| **資本四：在以下六類人當中，有多少人會在你的要求下肯定會幫助你?** | | | | | |
|  | 全部 | 大部分 | 一些 | 很少 | 沒有 |
| 1. 家庭成員 | 5 | 4 | 3 | 2 | 1 |
| 1. 親戚 | 5 | 4 | 3 | 2 | 1 |
| 1. 鄰居 | 5 | 4 | 3 | 2 | 1 |
| 1. 朋友 | 5 | 4 | 3 | 2 | 1 |
| 1. 同事 | 5 | 4 | 3 | 2 | 1 |
| 1. 同鄉/舊同學 | 5 | 4 | 3 | 2 | 1 |
| **資本五：當考慮以上者這六類人時，有多少人擁有以下資產/資源?** | | | | | |
|  | 全部 | 大部分 | 一些 | 很少 | 沒有 |
| 1. 一定的政治權力 | 5 | 4 | 3 | 2 | 1 |
| 1. 財富或一個企業或公司的擁有者 | 5 | 4 | 3 | 2 | 1 |
| 1. 與他人有廣泛的聯繫 | 5 | 4 | 3 | 2 | 1 |
| 1. 聲譽高/有影響力 | 5 | 4 | 3 | 2 | 1 |
| 1. 高中或以上學歷 | 5 | 4 | 3 | 2 | 1 |
| 1. 有專業的工作 | 5 | 4 | 3 | 2 | 1 |
| **資本六：您如何評價以下兩種類型的團體/組織在您的社區中的數量?** | | | | | |
|  | 很多 | 多於一般 | 一般 | 少於一般 | 很少 |
| 1. 政府、政治、經濟和社會團體/組織(政黨、婦女團體、村委會、工會、合作協會、志願者團體等) | 5 | 4 | 3 | 2 | 1 |
| 1. 文化、康樂及消閒團體/團體(宗教、鄉村成員、校友、體育、音樂、舞蹈、手工藝、遊戲等) | 5 | 4 | 3 | 2 | 1 |
| **資本七：你參加過多少以下兩類團體和組織的活動?** | | | | | |
|  | 全部 | 大部分 | 一些 | 很少 | 沒有 |
| 1. 政府、政治、經濟和社會團體/組織(政黨、婦女團體、村委會、工會、合作協會、志願者團體等) | 5 | 4 | 3 | 2 | 1 |
| 1. 文化、康樂及消閒團體/團體(宗教、鄉村成員、校友、體育、音樂、舞蹈、手工藝、遊戲等) | 5 | 4 | 3 | 2 | 1 |
| **資本八：在這兩種類型的團體和組織中，有多少代表你的權益?** | | | | | |
|  | 全部 | 大部分 | 一些 | 很少 | 沒有 |
| 1. 政府、政治、經濟和社會團體/組織(政黨、婦女團體、村委會、工會、合作協會、志願者團體等) | 5 | 4 | 3 | 2 | 1 |
| 1. 文化、康樂及消閒團體/團體(宗教、鄉村成員、校友、體育、音樂、舞蹈、手工藝、遊戲等) | 5 | 4 | 3 | 2 | 1 |
| **資本九：在這兩種類型的團體和組織中，有多少會根據你的要求幫助你?** | | | | | |
|  | 全部 | 大部分 | 一些 | 很少 | 沒有 |
| 1. 政府、政治、經濟和社會團體/組織(政黨、婦女團體、村委會、工會、合作協會、志願者團體等) | 5 | 4 | 3 | 2 | 1 |
| 1. 文化、康樂及消閒團體/團體(宗教、鄉村成員、校友、體育、音樂、舞蹈、手工藝、遊戲等) | 5 | 4 | 3 | 2 | 1 |
| **資本十：當考慮這兩類中的所有團體和組織時，有多少擁有以下資產/資源?** | | | | | |
|  | 全部 | 大部分 | 一些 | 很少 | 沒有 |
| 1. 重大的決策權力 | 5 | 4 | 3 | 2 | 1 |
| 1. 堅實的金融基礎 | 5 | 4 | 3 | 2 | 1 |
| 1. 廣泛的社會關係 | 5 | 4 | 3 | 2 | 1 |
| 1. 極具社會影響力 | 5 | 4 | 3 | 2 | 1 |

**第七部分︰社會接納程度量表**

請仔細閱讀以下每一個句子，如果你覺得那個答案適合你就圈起來。

|  | 非常不同意 | 不同意 | 普通 | 同意 | 非常同意 |
| --- | --- | --- | --- | --- | --- |
| 1. 我是我朋友生活中非常重要的一部分。 | 1 | 2 | 3 | 4 | 5 |
| 2. 我母親多次讓我失望。 | 1 | 2 | 3 | 4 | 5 |
| 3. 我父母反對我做的很多事情。 | 1 | 2 | 3 | 4 | 5 |
| 4. 我父親過於頻繁地管教我。 | 1 | 2 | 3 | 4 | 5 |
| 5. 我有時想知道別人是否喜歡我。 | 1 | 2 | 3 | 4 | 5 |
| 6. 每當我需要我母親的時候，她總是在我身邊。 | 1 | 2 | 3 | 4 | 5 |
| 7. 我父母通常都相信我能自己做決定。 | 1 | 2 | 3 | 4 | 5 |
| 8. 有時，我父親讓我覺得他不贊成我。 | 1 | 2 | 3 | 4 | 5 |
| 9. 我的朋友經常對我表示關心。 | 1 | 2 | 3 | 4 | 5 |
| 10. 我母親讓我覺得她真的接受了我。 | 1 | 2 | 3 | 4 | 5 |
| 11. 我是我的家庭的生活中非常重要的一部分。 | 1 | 2 | 3 | 4 | 5 |
| 12. 我父親從未真正理解過我。 | 1 | 2 | 3 | 4 | 5 |
| 13. 我總是可以依靠我的朋友。 | 1 | 2 | 3 | 4 | 5 |
| 14. 不管我做什麼說什麼，我母親都愛我、關心我。 | 1 | 2 | 3 | 4 | 5 |
| 15. 在與家人的關係中，我經常覺得自己被冷落了。 | 1 | 2 | 3 | 4 | 5 |
| 16. 在父親面前“做我自己”讓我感到很舒服。 | 1 | 2 | 3 | 4 | 5 |
| 17. 我的朋友對我的個人需求很敏感。 | 1 | 2 | 3 | 4 | 5 |
| 18. 我母親從來沒有真正理解過我。 | 1 | 2 | 3 | 4 | 5 |
| 19. 我有時會懷疑我的家人是否喜歡我。 | 1 | 2 | 3 | 4 | 5 |
| 20. 當我需要父親的時候，他總是在我身邊。 | 1 | 2 | 3 | 4 | 5 |
| 21. 在與他人的關係中，我經常感到自己被遺忘了。 | 1 | 2 | 3 | 4 | 5 |
| 22. 在母親面前“做我自己”讓我感覺很舒服。 | 1 | 2 | 3 | 4 | 5 |
| 23. 我的家人經常對我表示關心。 | 1 | 2 | 3 | 4 | 5 |
| 24. 我父親讓我覺得他真的接受了我。 | 1 | 2 | 3 | 4 | 5 |
| 25. 我向朋友們吐露內心深處的秘密。 | 1 | 2 | 3 | 4 | 5 |
| 26. 有時，我母親讓我覺得她不贊成我。 | 1 | 2 | 3 | 4 | 5 |
| 27. 我可以永遠依靠我的家人。 | 1 | 2 | 3 | 4 | 5 |
| 28. 我的父親愛我，關心我，無論我做什麼或說什麼。 | 1 | 2 | 3 | 4 | 5 |
| 29. 我覺得自己處於朋友圈的邊緣。 | 1 | 2 | 3 | 4 | 5 |
| 30. 我母親過於頻繁地管教我。 | 1 | 2 | 3 | 4 | 5 |
| 31. 我的家人對我的個人需求很敏感。 | 1 | 2 | 3 | 4 | 5 |
| 32. 我父親曾多次讓我失望。 | 1 | 2 | 3 | 4 | 5 |
| 33. 我有時覺得我的朋友不把我當作好朋友。 | 1 | 2 | 3 | 4 | 5 |
| 34. 我母親總是很小心，不傷害我的感情。 | 1 | 2 | 3 | 4 | 5 |
| 35. 我向家人吐露了我內心最深處的秘密。 | 1 | 2 | 3 | 4 | 5 |
| 36. 我父親總是小心翼翼地不傷害我的感情。 | 1 | 2 | 3 | 4 | 5 |
| 37. 我經常覺得我的朋友不理解我。 | 1 | 2 | 3 | 4 | 5 |
| 38. 我母親相信我會做對自己最適合的事。 | 1 | 2 | 3 | 4 | 5 |
| 39. 我經常感到家人不理解我。 | 1 | 2 | 3 | 4 | 5 |
| 40. 我父親相信我會做對自己最適合的事。 | 1 | 2 | 3 | 4 | 5 |
| 41. 我覺得我處於家庭關係的邊緣。 | 1 | 2 | 3 | 4 | 5 |
| 42. 我有時覺得我的家人不認為我是一個好的家庭成員。 | 1 | 2 | 3 | 4 | 5 |
| 43. 我的朋友們反對我所做的許多事情。 | 1 | 2 | 3 | 4 | 5 |
| 44. 我的朋友們通常都相信我能自己做決定。 | 1 | 2 | 3 | 4 | 5 |

**第八部分：法律認可同性傾向之全球指數(GILRHO)**

請仔細閱讀以下每一個句子，如果你覺得那個答案適合你就圈起來。

|  | 是 | 否 |
| --- | --- | --- |
| 1. 成人間的合意同性性行為合法與否。 | 1 | 0 |
| 1. 合意的同性性行為和異性性行為相比，其合法性是否有相同年齡限制。 | 1 | 0 |
| 1. 立法明確禁止聘雇員工時的性傾向歧視。 | 1 | 0 |
| 1. 立法明確禁止提供貨品或服務銷售的性傾向歧視。 | 1 | 0 |
| 1. 對未登記的同居同性伴侶有無任何法律認可。 | 1 | 0 |
| 1. 同性伴侶是否可以登記伴侶關係。 | 1 | 0 |
| 1. 同性伴侶是否可能共同領養小孩或成為另一雙親。 | 1 | 0 |
| 1. 同性伴侶是否可以結婚。 | 1 | 0 |

**第九部分：參加者基本資料**

| 1. | 你認為自己的性傾向是?(如選擇答案3，則無需回答第2題)  1□ 男同性戀 2 □雙性戀 3□異性戀 □其他 (如無性戀、不確定) |
| --- | --- |
|  |  |
| 2. | 你曾否向下列人士表明自己的性取向 (出櫃) (可選多項)  1□家人 2□朋友 3□工作同事 4□其他，請註明﹕_______________ |
|  |  |
| 3. | 你的宗教背景是?  1□沒有/不適用  2□有 請註明﹕_______________ |
|  |  |
| 4. | 你的婚姻狀況是？  1□單身 2□戀愛中 3□已婚  4□其他，請註明﹕_______________ |
|  |  |
| 5. | 你有否曾經醫生診斷患有精神病? (如抑鬱症，焦慮症等) |
|  | 1□沒有 2□有，請註明﹕___________________________ |
|  |  |
| 6. | 性別：1□男 2□女 3□其他：______________ |
|  |  |
| 7. | 年齡:_______________ |

8. 出生地點：1□香港 2□中國大陸 　3□其他，請註明﹕_______________

9. 在港居住年數(如在香港出生則不用填寫)：共_________年

10. 教育程度：

1□小學或以下 2□中一至中三 3□中四至中六

4□預科 5□專上非學位課程 6□專上學位課程或以上

11. 升學/就業情況：(可選多項)

1□學生 2□全職工作 3□散工或兼職工作

4□待業 5□自僱 6□其他：_______________

12. 你是否與家人同住?

1□是：與誰同住?(可選多項) 1□父親 2□母親 3□兄弟姐妹

4□祖父母/外祖父母 5□其他親人:_________

2□否：1□與朋友同住 2□自己一個住 3□ 伴侶同屋

4□其他：________

13. 你現在所居住的房屋類型是？

1□公營租住房屋（公屋） 2□村屋

3□私人永久性房屋（私樓） 4□資助出售單／夾屋

5□臨時房屋／木屋／板間房／劏房／籠屋 6□其他：________

14. 你每月的入息多少（包括工作薪資、綜合社會保障援助金（綜援金）、長俸或其他收入）？

1□$10,000 或以下 2□$10,001 - $20,000

3□$20,001 - $30,000 4□$30,001 - $40,000

5□$40,001 - $50,000 6□$50,001或以上

7□不知道

問卷結束，謝謝參與！
